# Supplementary figures and images for: Formation of air-stable copper–silver core–shell nanoparticles for inkjet printing
Source: Royal Society of Chemistry journal article supplement (doi:10.1039/b821327e), 2009-01-01

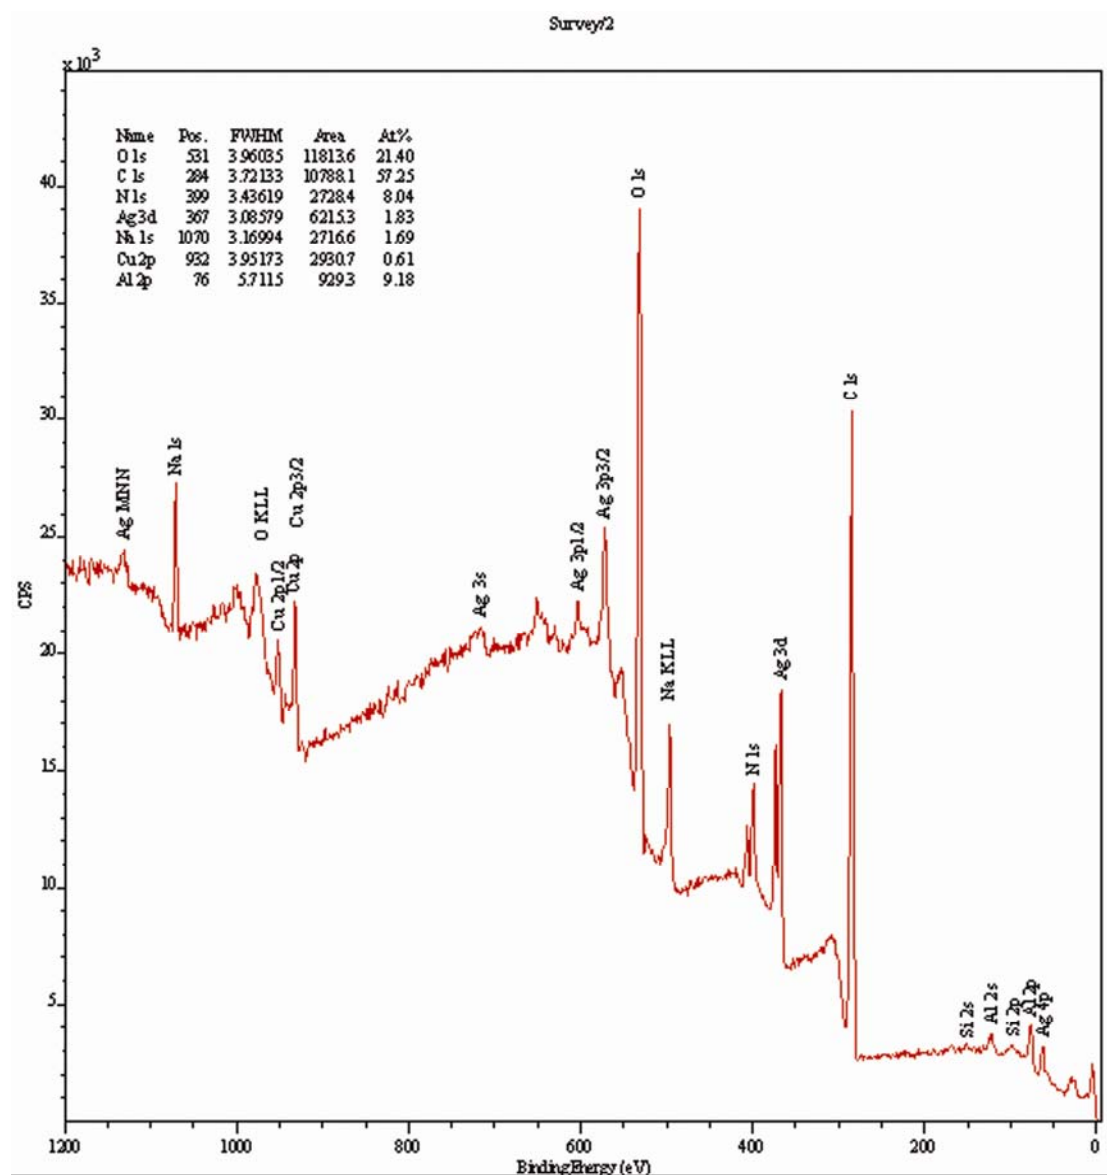

XPS analysis of a dried Cu<sub>core</sub>Ag<sub>shell</sub> NPs powder

Supplement: b821327e.pdf [file b821327e.pdf]
